# Supplementary material
Source: HighWire-hosted journal article supplement (https://www.qdcxjkg.com/highwire/filestream/113561/field_highwire_adjunct_files/10/34_vonLanz1946.pdf)
Supplement: 34_vonLanz1946.pdf [file 34_vonLanz1946.pdf]

Reference no. 34 of

Winkelmann A, Noack T: The Clara cell – a 'Third Reich eponym'? *Eur Respir J* 2010; 36: 722–727

von Lanz T: Erklärung [statement] für Professor Dr. med. Max Clara. 1946. *Archive*: Staatsarchiv, München. *Signature*: Spruchkammerakt Dr. Max Clara, Spruchkammern Kt. 244.

**Short comment by the authors:**

This is one of the affidavits mentioned in the decision of the appeal court in the denazification process (see reference 32). The anatomist Titus von Lanz explains in the second paragraph that he was prosecuted by the Nazis for having a Jewish wife and had to leave his post at the anatomical institute of Munich University in 1938. He writes that after 1938, the *Reichsdozentenführer* (leader of all lecturers of the Reich) Prof. Schultze had tried to keep him from continuing work on his book "*Praktische Anatomie*" (clinical anatomy), a definitive textbook, still well-known among anatomists today. Unlike the *Reichsdozentenführer*, Max Clara had supported his work by giving him access to anatomical specimens in Leipzig "from 1939 to 1943" (p. 2).

Professor Dr.med.  
Titus Ritter von Lanz

MÜNCHEN-PASING, 17.6.1946.  
EXTERSTRASSE 36  
FERNRUF 81698

E r k l ä r u n g

für Professor Dr.med. Max CLARA,  
Mü-Pasing, Rembrandt-Strasse 13.

Zum Zwecke der Vorlage bei deutschen und amerikanischen Behörden gebe ich nachstehende eidesstattliche Erklärung ab. Es ist mir bekannt, daß eine falsche eidesstattliche Erklärung mit Gefängnis bestraft wird.

Zu meiner Person :

Fragebogen der Militärregierung eingereicht : 1) dem Bayerischen Staatsministerium für Unterricht und Kultus für die Universität München; 2) der Ärztekammer München.

Nichtarisch verheiratet war ich von 1935 bis 1938 heftigen Verfolgungen durch die NSDAP mit dem Ziele ausgesetzt, mich aus meinem Berufe als Hochschullehrer (Anatomie, Universität München) auszuschalten. Zum 1.10.1938 wurde ich als politisch untragbar von der Hochschule entfernt und verlor die Venia legendi. Zum 1.7.1945 hat mich der Bayerische Staatsminister für Unterricht und Kultus mit Zustimmung der Militärregierung rehabilitiert.

Zu Herrn Professor Dr.med. Max Clara :

Der Reichsdozentenführer Prof. Walter Schulze hatte meine Entfernung aus der Hochschule in der Absicht ausgesprochen, mir jedes wissenschaftliche Arbeiten zu unterbinden. Im Gegensatz dazu wollte mir der Reichsforschungsrat (Geheimrat Professor Dr.med. Ferdinand Sauerbruch, Berlin) im Frühjahr 1939 die wissenschaftliche Arbeit an meinem Werk "Praktische Anatomie" durch Erteilung eines entsprechenden Forschungsauftrages ermöglichen, wenn mir der Direktor eines deutschen Anatomischen Institutes das hierfür erforderliche Material zur Verfügung stellen wollte. In offenkundigem Gegensatz zu der Absicht des Reichsdozentenführers hat Herr Pro-

fessor Max Clara, demals Leiter der Anatomischen Anstalt Leipzig, unverzüglich und in weitestem Umfang diese Unterstützung zugesagt und mir in allen folgenden Jahren von 1939 bis 1943 in ausgedehntem Maße auch tatsächlich zuteil werden lassen. Er hat mir also als politisch Verfehmten während der Zeit der Verfolgung meine wissenschaftliche Existenz ermöglicht und sich dadurch als Gegner der durch den Reichsdozentenführer vertretenen offiziellen Absicht der Partei erwiesen.

*Swiz*

Die Richtigkeit der  
Unterschrift wird  
hiermit beglaubigt :  
München, 17.6.1946.

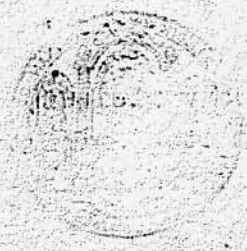

*A. Kuhn.  
Prodrkan.*

Staatsarchiv München  
Spr.Ka. Karton 244
